# Supplementary material for: Targeted Deletion of Thymosin Beta 4 in Hepatic Stellate Cells Ameliorates Liver Fibrosis in a Transgenic Mouse Model
Source: MDPI journal article supplement (doi:10.3390/cells12121658), 2023-06-18
Supplement: s1 [file s1]

## Supplementary materials

**Supplementary Table S1. Primer sequences used for real-time PCR**

| Gene          | Forward                 | Reverse               |
|---------------|-------------------------|-----------------------|
| <i>Tβ4</i>    | ATGTCTGACAAACCCGATATGGC | CCAGCTTGCTTCTCTTGTTCA |
| <i>α-Sma</i>  | AAACAGGAATACGACGAAG     | CAGGAATGATTTGGAAAGGA  |
| <i>Col1α1</i> | GAGCGGAGAGTACTGGATCG    | GCTTCTTTTCCTTGGGGTTC  |
| <i>Ilk</i>    | GTGAATGAGCACGGCAATGTG   | CCCATTTTCTCTGCCCGTTCT |
| <i>Gsk-3β</i> | CAGGGCACCCAGAGTTGATCTT  | GCTCCCTTGTTGGTGTTCCTA |
| <i>Smo</i>    | CAGCAAGATCTTCGAGACCA    | AAGTGGCAGATGAAGGTGAT  |
| <i>Gli2</i>   | CAAGCAGAACAGCGAGTCAG    | CCTCAGCCTCAGTCTTGACC  |
| <i>S9</i>     | GACTCCGGAACAAACGTGAGGT  | CTTCATCTTGCCCTGGTCCA  |

These primer sequences were used for qRT-PCR. The expression level of mRNA was normalized by the expression level of S9 mRNA.

Supplementary Figures

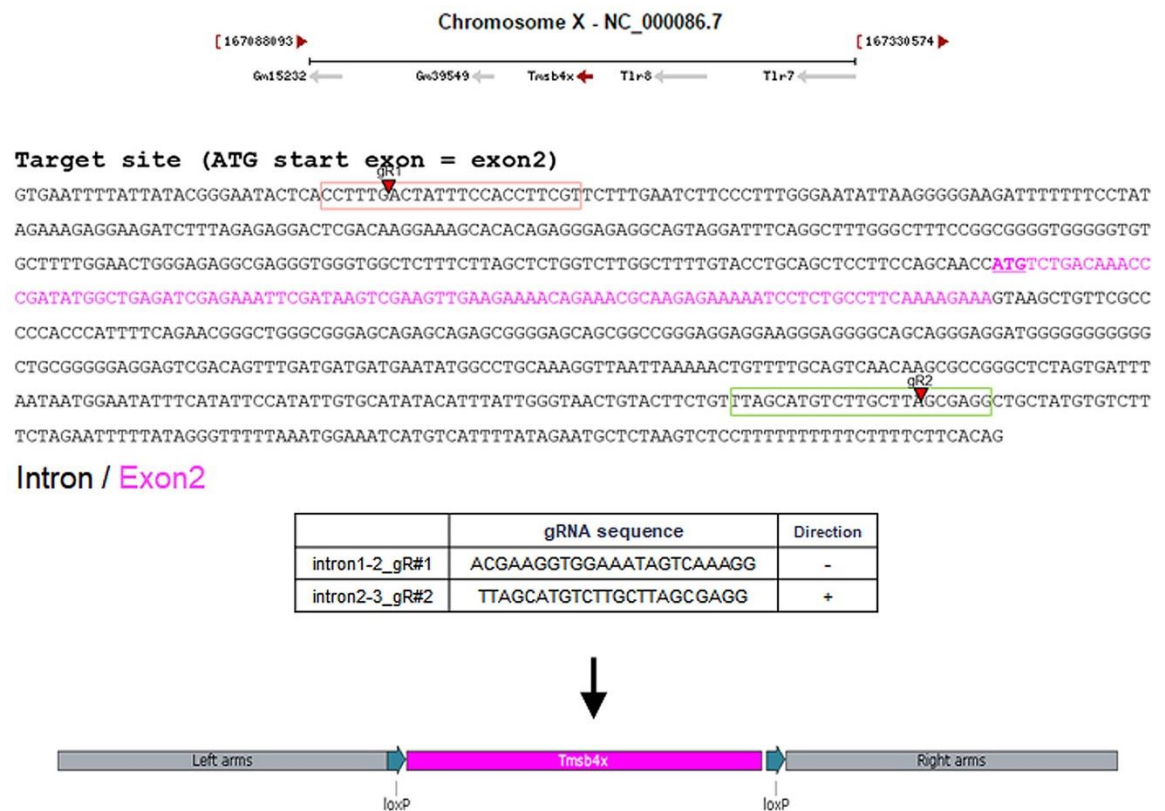

**Supplementary Figure S1. Design of guide RNAs for CRISPR/Cas9 genome editing.** Two different CRISPR gRNAs (gR#1, gR#2) were designed to separately target at the distinct locations of the Tβ4 intron 1-2 and intron 2-3, respectively, producing the floxed Tβ4 allele. Red inverted triangle indicates the insertion site of gR#1 and gR#2, respectively.

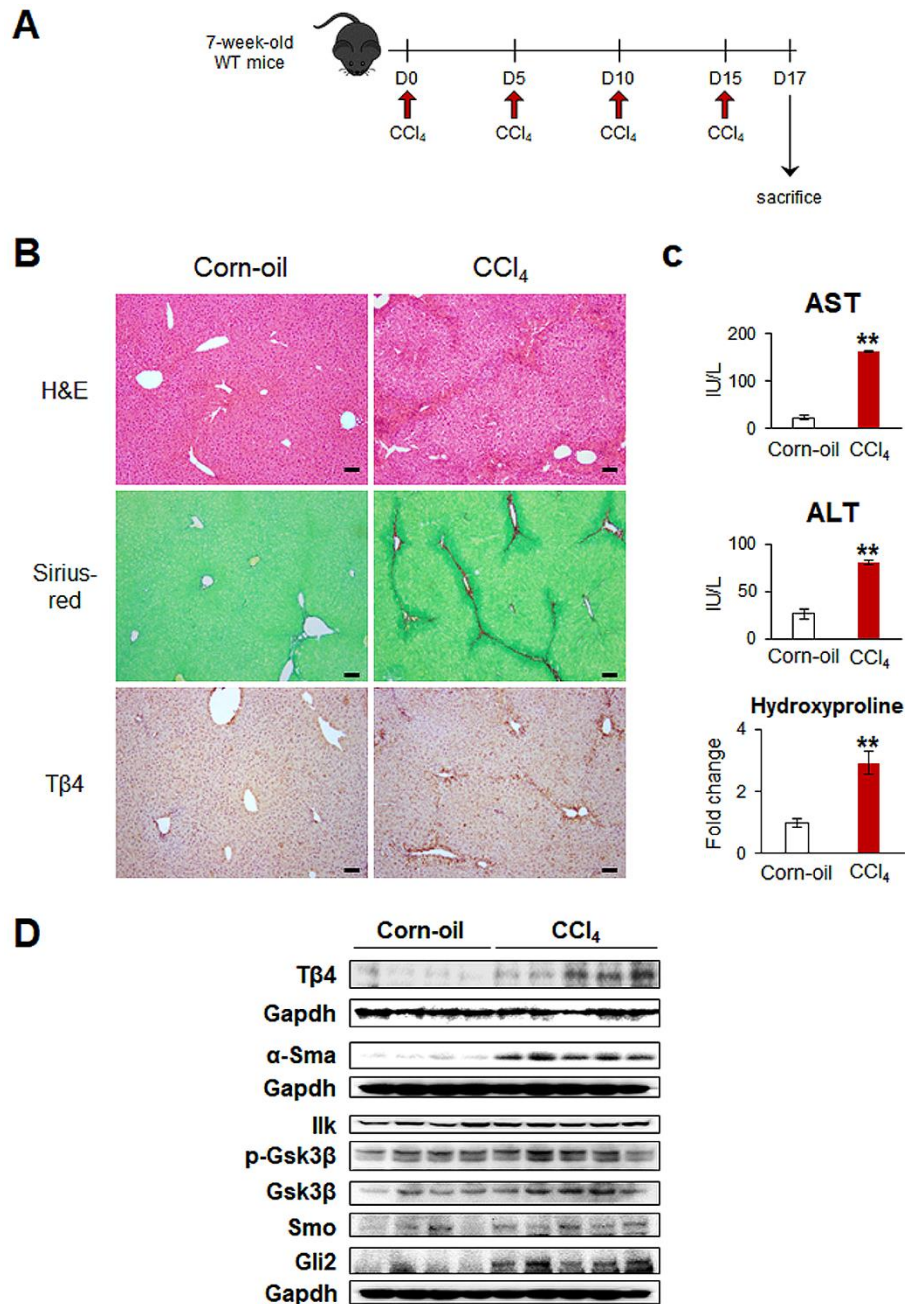

**Supplementary Figure S2. Mice receiving four injections of CCl<sub>4</sub> have liver damage with fibrosis and increased level of Tβ4 and Hh signaling**

(A) Schematic diagram showing the timing of four injections of carbon tetrachloride (CCl<sub>4</sub>) into wild-type (WT) mice. At 2 days after the last injection of CCl<sub>4</sub>, all WT mice receiving either CCl<sub>4</sub> (n=5) or corn-oil (n=4) were sacrificed. (B) Representative images of hematoxylin and eosin (H&E) staining, Sirius red staining and immunostaining for Tβ4 in liver sections of representative

mice from each group (scale bar = 50  $\mu\text{m}$ ). (C) Serum levels of AST and ALT, and hepatic hydroxyproline contents in the livers of all mice from each group (student's t-test;  $**p < 0.005$  vs. Corn-oil). (D) Representative immunoblots of T $\beta$ 4,  $\alpha$ -Sma, Ilk, pGsk-3 $\beta$ , Gsk-3 $\beta$ , Smo, and Gli2 in the livers from each group. Gapdh was used as an internal control.

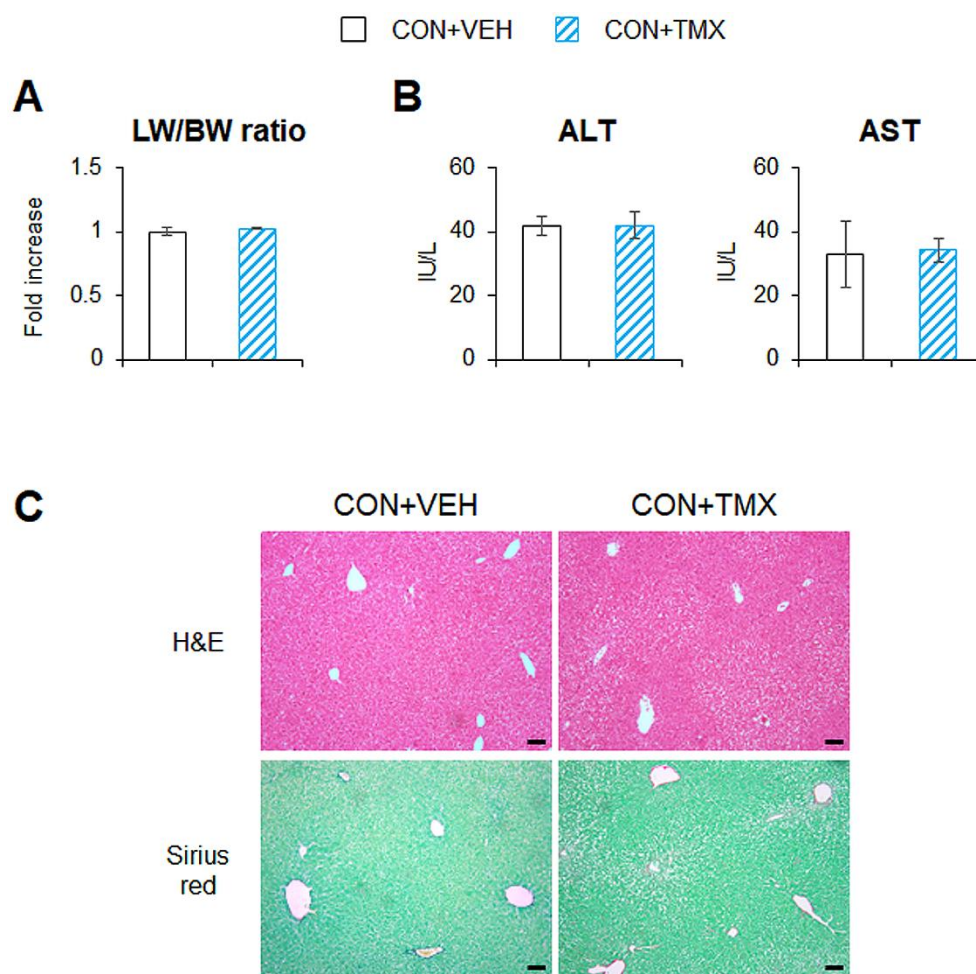

**Supplementary Figure S3. Tamoxifen rarely impacts the liver treated with corn-oil. (A)**

Relative ratio of liver weight to body weight (LW/BW) and (B) serum levels of ALT and AST in corn-oil injected DTG mice treated with either vehicle (CON+VEH) or tamoxifen (CON+TMX) (n=4 per group). Results of relative expression values are graphed as mean±s.e.m. (C)

Representative images of hematoxylin and eosin (H&E) staining and Sirius red staining in liver sections from representative mice from each group (scale bar = 50  $\mu$ m).

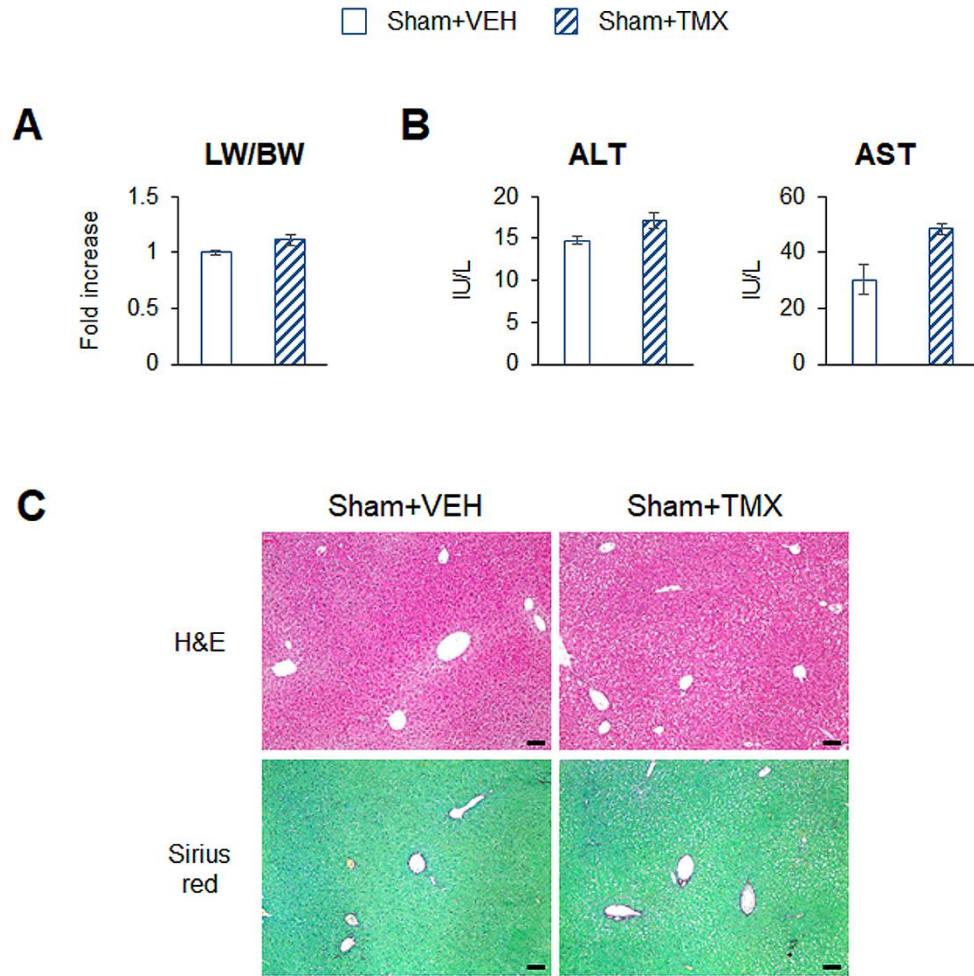

**Supplementary Figure S4. Tamoxifen hardly influences the liver subjected to sham surgery.** (A) Relative ratio of liver weight to body weight (LW/BW) and (B) serum levels of ALT and AST in DTG mice subjected to sham surgery and treated with either vehicle (Sham+VEH) or tamoxifen (Sham+TMX) (n=4 per group). Results of relative expression values are graphed as mean±s.e.m. (C) Representative images of hematoxylin and eosin (H&E) staining and sirius red staining in liver sections from representative mice from each group (scale bar = 50  $\mu$ m).
